# Supplementary material
Source: publisher site journal article supplement (https://www.spandidos-publications.com/8660/downloadSupplementary)
Supplement: Supplementary file 1 [file downloadSupplementary]

## Sheet: Sheet1
Table SV. Heterogeneity analysis results.
id.exposure	id.outcome	outcome	exposure	method	Q	Q_df	Q_pval
data.txt	data.txt	data.txt	data.txt	data.txt	data.txt	data.txt	data.txt
fJCrI3	renal_carcinoma	outcome	cg07431106	MR Egger	5.18813428740918	7	0.637016323352625
fJCrI3	renal_carcinoma	outcome	cg07431106	Inverse variance weighted	5.47343540711077	8	0.705981318854119
LRucJA	renal_carcinoma	outcome	SeqId_17161_1	MR Egger	0.571185078566448	1	0.449788381681901
LRucJA	renal_carcinoma	outcome	SeqId_17161_1	Inverse variance weighted	0.726519544521115	2	0.695405762906472
4Rffun	renal_carcinoma	outcome	SeqId_3448_13	Inverse variance weighted	4.57964566676143	1	0.0323539044749593
ZTeVw3	renal_carcinoma	outcome	SeqId_4125_52	MR Egger	11.6409394025121	7	0.113002392832746
ZTeVw3	renal_carcinoma	outcome	SeqId_4125_52	Inverse variance weighted	11.6414194175238	8	0.167934144824645
LYjIgy	renal_carcinoma	outcome	cg08884395	MR Egger	6.34080503460452	7	0.500565823851867
LYjIgy	renal_carcinoma	outcome	cg08884395	Inverse variance weighted	10.4271872099849	8	0.236313182850475
MUjuf5	renal_carcinoma	outcome	cg12446953	MR Egger	6.06324162192724	4	0.194474869579732
MUjuf5	renal_carcinoma	outcome	cg12446953	Inverse variance weighted	6.14929024143328	5	0.291962231770111
UcHTKP	renal_carcinoma	outcome	ENSG00000008710	MR Egger	17.5106871953646	16	0.353317325711654
UcHTKP	renal_carcinoma	outcome	ENSG00000008710	Inverse variance weighted	17.6044510273953	17	0.414195366045794
